# Supplementary material for: SnS2nanoflakes for efficient humidity and alcohol sensing at room temperature
Source: Royal Society of Chemistry journal article supplement (doi:10.1039/c6ra21252b), 2016-01-01
Supplement: c6ra21252b1.pdf [file c6ra21252b1.pdf]

## Supporting information

# SnS<sub>2</sub> Nanosheets for efficient humidity and alcohol sensing at room temperature

Lakshmi Deepika Bharatula<sup>1</sup>, Manisha B. Erande<sup>1</sup>, Imtiaz S. Mulla<sup>1</sup>, Chandra Sekhar Rout<sup>2</sup> and Dattatray J. Late<sup>1\*</sup>

<sup>1</sup>Physical and Material Chemistry Division, CSIR – National Chemical Laboratory, Homi Bhabha Road, Pune, 411008, Maharashtra, India.

<sup>2</sup>School of Basic Sciences, Indian Institute of Technology, Bhubaneswar 751013, India

**Figure S1:**

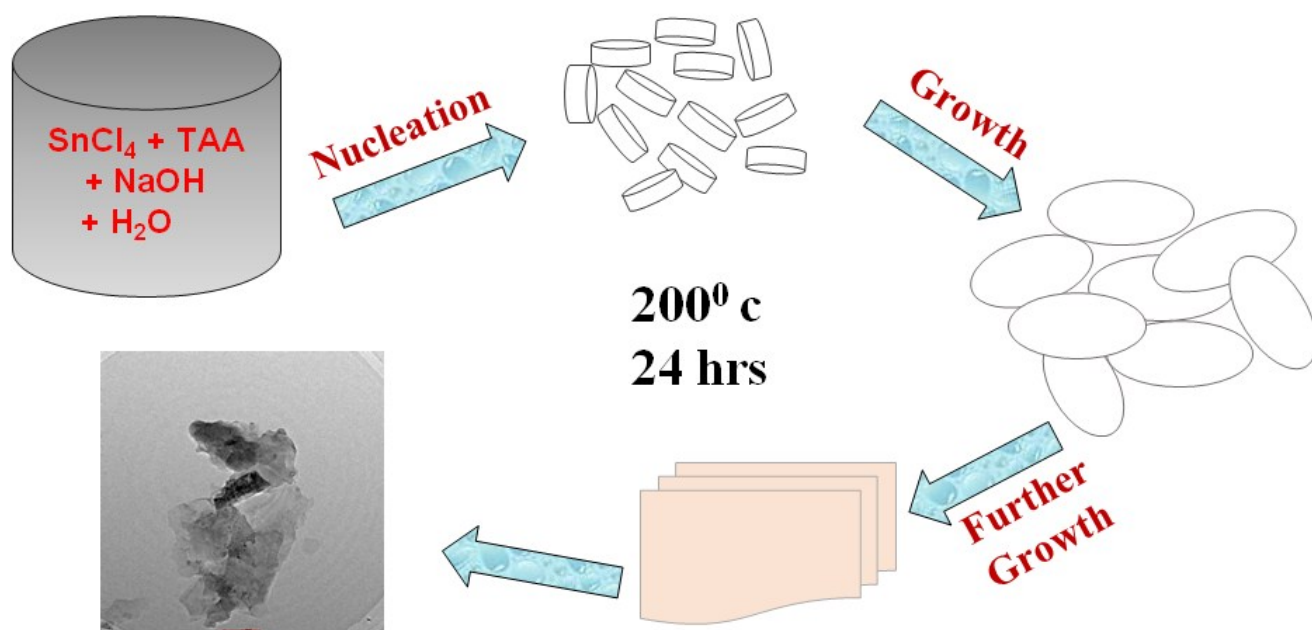

Figure S1: The schematic diagram of synthesis of SnS<sub>2</sub> nanosheets.

**Figure S2:**

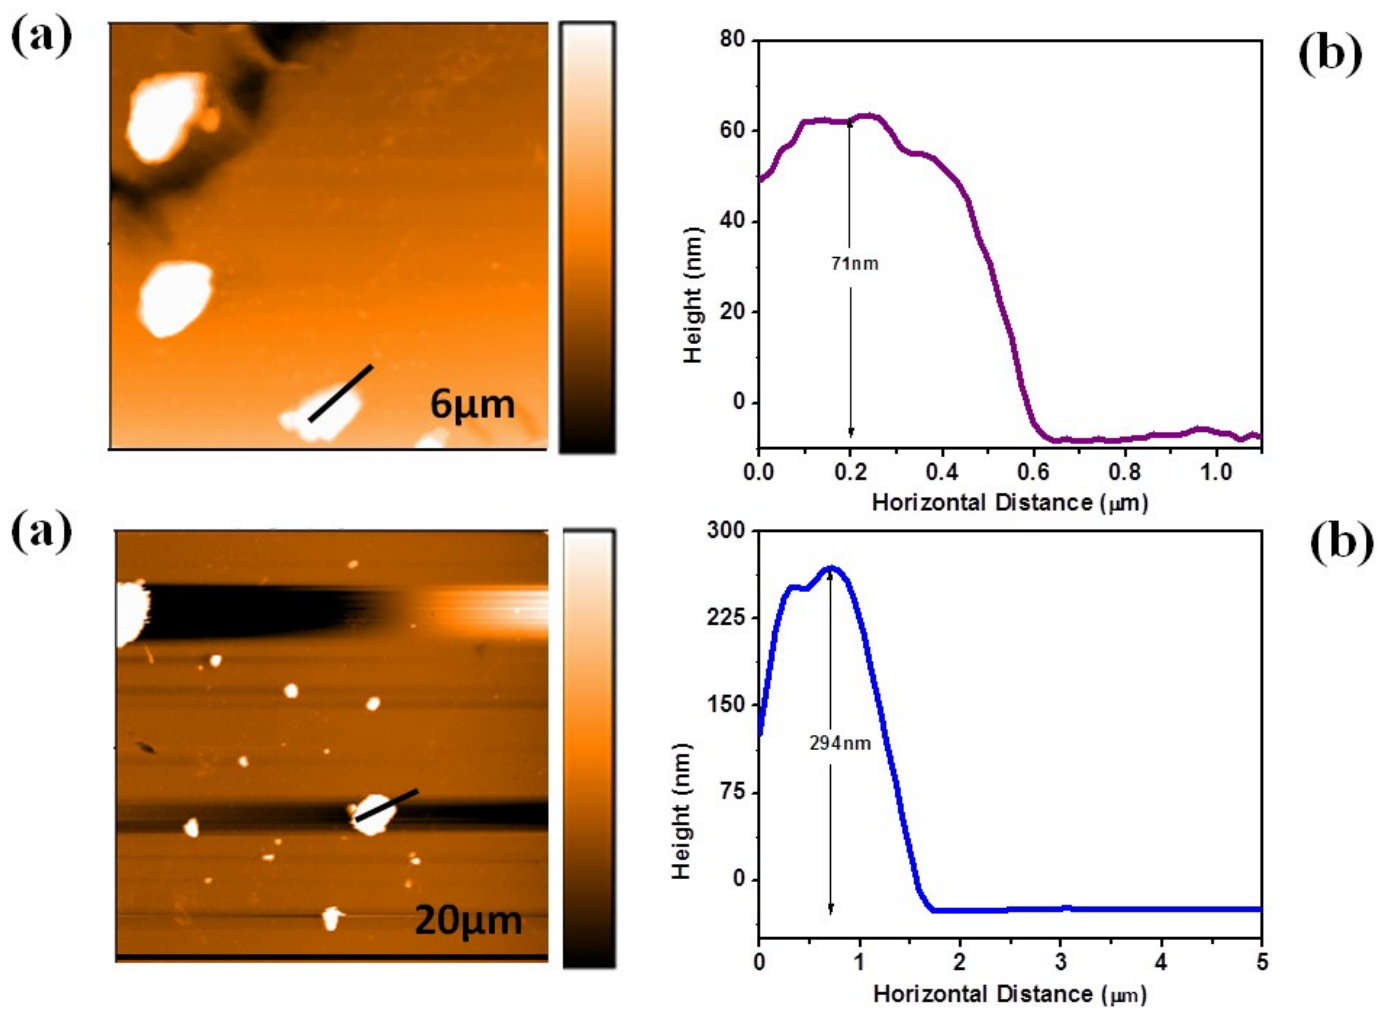

**Figure S2:** AFM and AFM height profile of of SnS<sub>2</sub> nanosheet using hydrothermal method.

**Figure S3:**

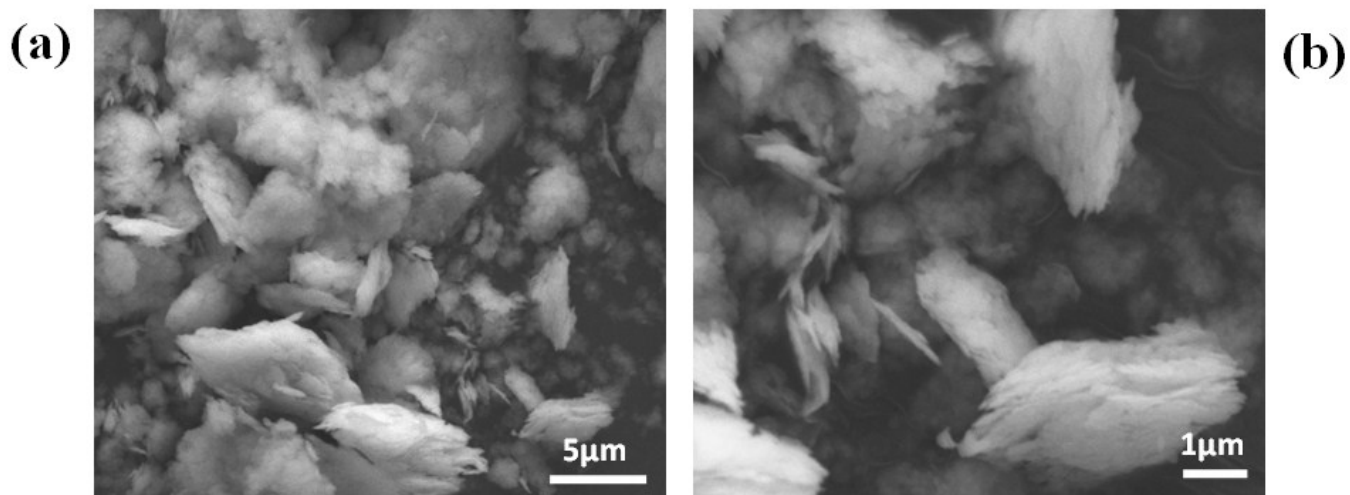

Figure S3: Typical SEM images of SnS<sub>2</sub> nanosheets recorded after few months showing agglomeration of nanosheets.
